# Supplementary material for: Characterization and Comparison of Clavibacter michiganensis subsp. nebraskensis Strains Recovered from Epiphytic and Symptomatic Infections of Maize in Iowa
Source: PubMed Central journal article supplement (PMC4658045; doi:10.1371/journal.pone.0143553), 2015-11-24
Supplement: pone.0143553.s001.pdf [file pone.0143553.s001.pdf]

Cmn00144\_CEL\_A\_GENE

NE3 TCAGTGCACCGGATAGAACCGGCGCGCCGTA CTCTGGATCTCCCCTGGTG 50  
HF4 TCAGTGCACCGGATAGAACCGGCGCGCCGTA CTCTGGATCTCCCCTGGTG 50

NE3 CCATTCGGATTCCGGGGAGAACGACCGAGCGACCGTATTGGTCAGTCACT 100  
HF4 CCATTCGGATTCCGGGGAGAACGACCGAGCGACCGTATTGGTCAGTCACT 100

NE3 CTAACGGTCATCGGGCCGTCCGGGATAGGTGAAGGTGTCACCCAGTACCC 150  
HF4 CTAACGGTCATCGGGCCGTCCGGGATAGGTGAAGGTGTCACCCAGTACCC 150

NE3 GTAGTCAGTGC GGCTCAGGCCAGCCACTGTCCATCGGCTTGGACTTCAA 200  
HF4 GTAGTCAGTGC GGCTCAGGCCAGCCACTGTCCATCGGCTTGGACTTCAA 200

NE3 CATGGTCGATGGGGTTGCCGGCGTTCAGAATCTGCAGACCGGCCACCAT 250  
HF4 CATGGTCGATGGGGTTGCCGGCGTTCAGAATCTGCAGACCGGCCACCAT 250

NE3 CGGGATGAGCCCTCCTTGACCCGGACGGCGACATCGGGCACGTCCGGATC 300  
HF4 CGGGATGAGCCCTCCTTGACCCGGACGGCGACATCGGGCACGTCCGGATC 300

NE3 CCGGACGGTGGTGTAGCTGATCGGGATGACGCCGGCATCGAAGTCGCCGA 350  
HF4 CCGGACGGTGGTGTAGCTGATCGGGATGACGCCGGCATCGAAGTCGCCGA 350

NE3 CGGCACGGAACGCTTCCTCGCTCAAGTCGAGATGTCCGATCTCGCACTCG 400  
HF4 CGGCACGGAACGCTTCCTCGCTCAAGTCGAGATGTCCGATCTCGCACTCG 400

NE3 TGGCATTGGTCGACGATTTGGACGCGGACGGTGCCCTTGGGGCCCGTGAC 450  
HF4 TGGCATTGGTCGACGATTTGGACGCGGACGGTGCCCTTGGGGCCCGTGAC 450

NE3 GAGGAGGTACGAACCGCACGCGGGCGGCTCCGCTGTACTCGGGGCTGCTGA 500  
HF4 GAGGAGGTACGAACCGCACGCGGGCGGCTCCGCTGTACTCGGGGCTGCTGA 500

NE3 CCGCAACGTACATGCGGTTCGGCGGGGACAGCCGGCATGGAGCAGTTGCCA 550  
HF4 CCGCAACGTACATGCGGTTCGGCGGGGACAGCCGGCATGGAGCAGTTGCCA 550

NE3 TTCGCGATCGTGTTGCCGGTACCGAGCGAGTAGTGCGTGGCACGGCCGTG 600  
HF4 TTCGCGATCGTGTTGCCGGTACCGAGCGAGTAGTGCGTGGCACGGCCGTG 600

NE3 CGTCGCCGACTGGGACGGCGGCGTGGGCTGGGACGGCGGCGTGGGCTGGG 650  
HF4 CGTCGCCGACTGGGACGGCGGCGTGGGCTGGGACGGCGGCGTGGGCTGGG 650

NE3 ACGGCGGCGTGGGCTGGGACGGCGGCGT-----TCCG 682  
HF4 ACGGCGGCGTGGGCTGGGACGGCGGCGTGGGCTGGGACGGCGGCGTTCGG 700

NE3 GCCGCTGTGGCACTGATTTGAGGGCAAGAGGGAGCGGGTCCACCCGCCAA 732  
HF4 GCCGCTGTGGCACTGATTTGAGGGCAAGAGGGAGCGGGTCCACCCGCCAA 750

NE3 CTGCACGCCGACGCTAACGGTCTGTCCGGCGGCGAGCTCGCTTGCCCAGT 782

HF4 CTGCACGCCGACGCTAACGGTCTGTCCGGCGGCGAGCTCGCTTGCCCAGT 800

NE3 CCGTGCCGGTGCAGGTCACGGTGTGGAGGCGACGCTACAGCGCATGCCC 832  
HF4 CCGTGCCGGTGCAGGTCACGGTGTGGAGGCGACGCTACAGCGCATGCCC 850

NE3 CAACTGTTGACGACGCCGGTGGTTTCCGGGCTGGCCCATGAGACGGTCCA 882  
HF4 CAACTGTTGACGACGCCGGTGGTTTCCGGGCTGGCCCATGAGACGGTCCA 900

NE3 TCCCGTGACAGCGTCTGTGCGGGTGACGTCGAGGTTCCGCCACGTAGCCGG 932  
HF4 TCCCGTGACAGCGTCTGTGCGGGTGACGTCGAGGTTCCGCCACGTAGCCGG 950

NE3 ATGCCCAGGACCCGCCGGCTGCCACTTCGCTGAAATCGCGCCTGGCTTC 982  
HF4 ATGCCCAGGACCCGCCGGCTGCCACTTCGCTGAAATCGCGCCTGGCTTC 1000

NE3 GCCGGACCTGGCTGCGATTCGGATCCGCCAGATCCCGGACCCGCTGCGGT 1032  
HF4 GCCGGACCTGGCTGCGATTCGGATCCGCCAGATCCCGGACCCGCTGCGGT 1050

NE3 GCGGCTGAGGCAGGCGCGGCGAATGCGCCAAACGTGGCACC GACTGCCA 1082  
HF4 GCGGCTGAGGCAGGCGCGGCGAATGCGCCAAACGTGGCACC GACTGCCA 1100

NE3 T 1083  
HF4 T 1101

Cmn02650\_Endoglucanase\_gene

GIL1 ATGCAGCACCACCGTCACCCCATCCGCACCGCGACCACCCTCGTCCTGGG 50  
HF4 ATGCAGCACCACCGTCACCCCATCCGCACCGCGACCACCCTCGTCCTGGG 50

GIL1 TCTCGCCCTCACCGCCGGGATCCTCACCGCAGCATCCCCCGCCAGCGCCG 100  
HF4 TCTCGCCCTCACCGCCGGGATCCTCACCGCAGCATCCCCCGCCAGCGCCG 100

GIL1 CCACCACCGGCCCGGCCCGACCAGTTCGCGAGCGGCGCTCCGACCGTCTCC 150  
HF4 CCACCACCGGCCCGGCTCCGACCGTTCGCGAGCGGCGCTCCGACCGTCTCC 150  
\* \*

GIL1 GACGCGCGGCTCCGCTTCGGCGTCGCCACCCCCGGCGGCCCGACCACAC 200  
HF4 GACGCGCGGCTCCGCTTCGGCGTCGCCACCCCCGGCGGCCCGACCACAC 200

GIL1 CGGCGAGCTCGACGCCGTAGCCCAGCAGGTCGGCGAGGACCCGAGCATCG 250  
HF4 CGGCGAGCTCGACGCCGTAGCCCAGCAGGTCGGCGAGGACCCGAGCATCG 250

GIL1 TGCTCGCGTACGCCGACTTCACGCAGGCGCCGCCATCGCGGCCCTCGAC 300  
HF4 TGCTCGCGTACGCCGACTTCACGCAGGCGCCGCCATCGCGGCCCTCGAC 300

GIL1 TCGGTTCGCGGCGCGCGGTGCCGAGACGCTCCTCACGTGGGAGCCGTGGAC 350  
HF4 TCGGTTCGCGGCGCGCGGTGCCGAGACGCTCCTCACGTGGGAGCCGTGGAC 350

GIL1 GGCCGGCGCCGGCGTGGATCAGCCCACGTTACGAACGCGAGCATCGCCG 400  
HF4 GGCCGGCGCCGGCGTGGATCAGCCCACGTTACGAACGCGAGCATCGCCG 400

GIL1 CGGGCGACCACGACGCCTACATCCGCGAGTGGGGCGCCGCCCTGGCGAAG 450  
HF4 CGGGCGACCACGACGCCTACATCCGCGAGTGGGGCGCCGCCCTGGCGAAG 450

GIL1 TGGGGCGGACCCGTCTCCCTCCGCTACGCGCACGAGATGAACGGCGACTG 500  
HF4 TGGGGCGGACCCGTCTCCCTCCGCTACGCGCACGAGATGAACGGCGACTG 500

GIL1 GTACCCGTGGGCCGACGGCGTCAACGGCAACGCGCCGGGCTCCTACGCCG 550  
HF4 GTACCCGTGGGCCGACGGCGTCAACGGCAACGCGCCGGGCTCCTACGCCG 550

GIL1 CCGCATTCCGGCACGTGCACGACGTCGTCGTGGGCGCCGGCGCGACCAAC 600  
HF4 CCGCATTCCGGCACGTGCACGACGTCGTCGTGGGCGCCGGCGCGACCAAC 600

GIL1 GTGCGCTGGGTGTGGACGCCGAACGTGCCGTACACCGGATCCACCGCCCT 650  
HF4 GTGCGCTGGGTGTGGACGCCGAACGTGCCGTACACCGGATCCACCGCCCT 650

GIL1 CGCGGGGCTCTACCCGGGCGCCGGCTACGTCGACGTCGTCGGCCTCGACG 700  
HF4 CGCGGGGCTCTACCCGGGCGCCGGCTACGTCGACGTCGTCGGCCTCGACG 700

GIL1 GCTACAACCTGGGGCTCCGTCGCCGGCCAGAGCTGGACCGCGCCGAGCGAC 750  
HF4 GCTACAACCTGGGGCTCCGTCGCCGGCCAGAGCTGGACCGCGCCGAGCGAC 750

GIL1 CTATTCGGCGCCGGTCTCGAGCAGCTGCGCGCCATCGCGCCGGGGAAGCC 800  
HF4 CTGTTTCGGCGCCGGTCTCGAGCAGCTGCGCGCCATCGCGCCGGGGAAGCC 800

\*

GIL1 GATCGTCATCGCGGAGACCGCATCCTCCGAGGTCGGCGGATCCAAGGCC 850  
HF4 GATCGTCATCGCGGAGACCGCATCCTCCGAGGTCGGCGGATCCAAGGCC 850

GIL1 AGTGGGACGGCGAGCTCGTCTCCTTCCTGCAGGCCAGACCGACGTCGTC 900  
HF4 AGTGGGACGGCGAGCTCGTCTCCTTCCTGCAGGCCAGACCGACGTCGTC 900

GIL1 GCCTTCGTCTGGTTCGACATGGACAAGGAGGCGGACTGGCGCATCGGCAG 950  
HF4 GCCTTCGTCTGGTTCGACATGGACAAGGAGGCGGACTGGCGCATCGGCAG 950

GIL1 CTCCGCGTCGTCCGCCACCGCCATCCACGACGCGCTCGCCGCCCGTCGCC 1000  
HF4 CTCCGCGTCGTCCGCCACCGCCATCCACGACGCGCTCGCCGCCCGTCGCC 1000

GIL1 TCCAGTAG 1008  
HF4 TCCAGTAG 1008

Cmn02651\_Endoglucanase\_gene

NE3 ATGCCCACTCGCCGCCGTCTCAAATGCGCCGTCGTCACCGCCGTCGCACC 50  
HF4 ATGCCCACTCGCCGCCGTCTCAAATGCGCCGTCGTCACCGCCGTCGCACC 50

NE3 GGCAGTCGTGACAGCCACCGTGCTCGTCGCTCCCGCGGCCGGCGCCCGCG 100  
HF4 GGCAGTCGTGACAGCCACCGTGCTCGTCGCTCCCGCGGCCGGCGCCCGCG 100

NE3 CCGCCTCGGCGCAGGCCCGCACCCACGGCCCCCGCCGCGACCGTCCTCTCC 150  
HF4 CCGCCTCGGCGCAGGCCCGCACCCACGGCCCCCGCCGCGACCGTCCTCTCC 150

NE3 GTCGCCTCCGGCCCGGTTCGGCACGCCCGTCACCGTCACCGGCACGGGCTT 200  
HF4 GTCGCCTCCGGCCCGGTTCGGCACGCCCGTCACCGTCACCGGCACGGGCTT 200

NE3 CCCC CGAAGAAGGCCGCGGTTCGTCGCCGTCGGTTCGACCACGAAGCGCA 250  
HF4 CCCC CGAAGAAGGCCGCGGTTCGTCGCCGTCGGTTCGACCACGAAGCGCA 250

NE3 TCACGACCACCGCCACGGGCCGCTTCACGACC GCGATCACCATCCCCCGC 300  
HF4 TCACGACCACCGCCACGGGCCGCTTCACGACC GCGATCACCATCCCCCGC 300

NE3 ACCTCGCTCTCCACCATCCGGATCACC GCGACGGCCGGCACCCGCTCGGC 350  
HF4 ACCTCGCTCTCCACCATCCGGATCACC GCGACGGCCGGCACCCGCTCGGC 350

NE3 CGGGGCCCCCTTCACCGTCACCACGGCCAAGTCGAACGGATCCGCCCGCC 400  
HF4 CGGGGCCCCCTTCACCGTCACCACGGCCAAGTCGAACGGATCCGCCCGCC 400

NE3 TGGGCGCGTCCGCCCGGGCCCCACCACGACCCCGGCGCCCGCTCCTACG 450  
HF4 TGGGCGCGTCCGCCCGGGC----- 419  
\*\*\*\*\*

NE3 GCGCGGCCACCTCCACCGCCGCTCCCGCCCCGGCGACCTCCTCGCCCCG 500  
HF4 -----GACCTCCTCGCCCCG 434  
\*\*\*\*\*

NE3 GCCCGCCGCATCCGCCGCCCCCGCCATCAGCTCCGCCCGCCTGCGCCTCG 550  
HF4 GCCCGCCGCATCCGCCGCCCCCGCCATCAGCTCCGCCCGCCTGCGCCTCG 484

NE3 GCCTCTCGACCCCCGGCGGGCCGACGGCGAACGGCGAGCTCGACGCGGGC 600  
HF4 GCCTCTCGACCCCCGGCGGGCCGACGGCGAACGGCGAGCTCGACGCGGGC 534

NE3 TCGACGACGCTCGGCGAGAGCCCCCTCCATCGTGATGAGCCACGTCGACTT 650  
HF4 TCGACGACGCTCGGCGAGAGCCCCCTCCATCGTGATGAGCCACGTCGACTT 584

NE3 CACCCACCCGGCGCCCATCGCCGGGCTCCGGAGCGTGGCCGCGCGCGGGC 700  
HF4 CACCCACCCGGCGCCCATCGCCGGGCTCCGGAGCGTGGCCGCGCGCGGGC 634

NE3 CCGACAGCCTCATCACGTGGGAGCCGTGGCAGGGCGGCGGGCGTTCGAC 750  
HF4 CCGACAGCCTCATCACGTGGGAGCCGTGGCAGGGCGGCGGGCGTTCGAC 684

NE3 CAGCCCGCCTACGCGAACGCGCGCATCGTCGCCGGCGACTACGACTCGTA 800  
HF4 CAGCCCGCCTACGCGAACGCGCGCATCGTCGCCGGCGACTACGACTCGTA 734

NE3 CATCCGCTCGTGGGGCGCCGACCTCGCGAAGTACGGCCAGCCCGTCTACC 850  
HF4 CATCCGCTCGTGGGGCGCCGACCTCGCGAAGTACGGCCAGCCCGTCTACC 784

NE3 TGCGCTTCGGCCACGAGATGAACGGCAACTGGTACCCGTGGTCCGACGGC 900  
HF4 TGCGCTTCGGCCACGAGATGAACGGCAACTGGTACCCGTGGTCCGACGGC 834

NE3 GTCAACGGCAACGCGTCCGGCTCCTACGTGCAGGCGTGGAAGCACGTGCA 950  
HF4 GTCAACGGCAACGCGTCCGGCTCCTACGTGCAGGCGTGGAAGCACGTGCA 884

NE3 CGACCTCGTCGCCGCGCAGGGGGCCACGAACGTGAAGTGGGTGTGGAGCC 1000  
HF4 CGACCTCGTCGCCGCGCAGGGGGCCACGAACGTGAAGTGGGTGTGGAGCC 934

NE3 CGAACGTGCCGTACCCGGGATCCACCGACCTCGCCTCCCTCTACCCCGGC 1050  
HF4 CGAACGTGCCGTACCCGGGATCCACCGACCTCGCCTCCCTCTACCCCGGC 984

NE3 GCCGACCAGGTCGACGTCGTCGCGCTCGACGGCTACAAC TGGGGCGCCGT 1100  
HF4 GCCGACCAGGTCGACGTCGTCGCGCTCGACGGCTACAAC TGGGGCGCCGT 1034

NE3 GCCCGGCCAGCGCTGGACCGCGCCCGCCGACCTCTTCGGCCCCGGAATGG 1150  
HF4 GCCCGGCCAGCGCTGGACCGCGCCCGCCGACCTCTTCGGCCCCGGAATGG 1084

NE3 CGCAGCTGCGCGCCGTGCGACCCGGGAAGCCGCTCATCATCGGCGAGGTG 1200  
HF4 CGCAGCTGCGCGCCGTGCGACCCGGGAAGCCGCTCATCATCGGCGAGGTG 1134

NE3 GCGTCGGGCGAGACCGGCGGATCCAAGGCCGACTGGGACCGCGACCTCGT 1250  
HF4 GCGTCGGGCGAGACCGGCGGATCCAAGGCCGACTGGGACCGCGACCTCGT 1184

NE3 CGCGTACCTCCAGTCGCAGCCCGACGTGCTCGGCTTCGTGTGGTTCGACT 1300  
HF4 CGCGTACCTCCAGTCGCAGCCCGACGTGCTCGGCTTCGTGTGGTTCGACT 1234

NE3 TCAAGAAGGAGGAGGACTGGCGGATCGACAGCTCGGCCGCCTCCGCCACC 1350  
HF4 TCAAGAAGGAGGAGGACTGGCGGATCGACAGCTCGGCCGCCTCCGCCACC 1284

NE3 GCCCTCCGCGACGCGCTCGCCCTGCGGGCGGGCTGA 1386  
HF4 GCCCTCCGCGACGCGCTCGCCCTGCGGGCGGGCTGA 1320

XylanaseB\_GENE

GIL1 ATGAGCATTCCCCGCACCGACACGTCCGCGCTCGCGGACGTCAGCCCCC 50  
HF4 ATGAGCATTCCCCGCACCGACACGTCCGCGCTCGCGGACGTCAGCCCCC 50

GIL1 GCGCTTGGGCCGAGCAGGTTTCGCGCCCCGCCGCGACGCGACCGCCGCC 100  
HF4 GCGCTTGGGCCGAGCAGGTTTCGCGCCCCGCCGCGACGCGACCGCCGCC 100

GIL1 GCGGCCTCGCCGCCCTCACGGCCCTCGGCCTGATCGCCGGGGCTGGCGCC 150  
HF4 GCGGCCTCGCCGCCCTCACGGCCCTCGGCCTGATCGCCGGGGCTGGCGCC 150

GIL1 CTCACCGCCCCCGCCGCGCAGGCCGCCGACGCCGCAGCTCCCGCCGGCAT 200  
HF4 CTCACCGCCCCCGCCGCGCAGGCCGCCGACGCCGCAGCTCCCGCCGGCAT 200

GIL1 CGGATCCGACTTCGAATCCGGCACGGGCGCATGGGCGCCGCGCGGGGACG 250  
HF4 CGGATCCGACTTCGAATCCGGCACGGGCGCATGGGCGCCGCGCGGGGACG 250

GIL1 GCGTCCGCATCGCCCCGAGTACCGAGGCGCGCACCCGGATCCGGCAGCCTG 300  
HF4 GCGTCCGCATCGCCCCGAGTACCGAGGCGCGCACCCGGATCCGGCAGCCTG 300

GIL1 CTCGTACCGACCGGACGCAGGAGTGGCACGGCGCCGCGCTGGACGTCAC 350  
HF4 CTCGTACCGACCGGACGCAGGAGTGGCACGGCGCCGCGCTGGACGTCAC 350

GIL1 GGGCGCGCTGACCGTCCGCCAGCAGGTCGAGGTCACGGTGTGGGCGCGCC 400  
HF4 GGGCGCGCTGACCGTCCGCCAGCAGGTCGAGGTCACGGTGTGGGCGCGCC 400

GIL1 TGGCCGCGGGGAGGAGCCCGCATCCCTCAAGGTCTCCGTGCAGCGCGAC 450  
HF4 TGTCCGCGGGGAGGAGCCCGCATCCCTCAAGGTCTCCGTGCAGCGCGAC 450  
\*

GIL1 ACCGGCGGCGGCAGCGGCTACGACGGCGTGGCGGGAGCCGCCGCGCGCT 500  
HF4 ACCGGCGGCGGCAGCGGCTACGACGGCGTGGCGGGAGCCGCCGCGCGCT 500

GIL1 CACCGCCGACGCCTGGACGGAGCTCACGGGCACGTACACGCTCGGCGGCC 550  
HF4 CACCGCCGACGCCTGGACGGAGCTCACGGGCACATACACGCTCGGCGGCC 550  
\*

GIL1 CGGTCGACAAGGCGCAGGTGTACGTGGAGGGGACCGTCGGCGCGGACTTC 600  
HF4 CGGTCGACAAGGCGCAGGTGTACGTGGAGGGGACCGTCGGCGCGGACTTC 600

GIL1 CTCCTCGACGACTTCCAGTTGGGCGAGGCCGTTTCCACGCCCGTGCAGAC 650  
HF4 CTCCTCTACGACTTCCAGTTGGGCGAGGCCGTTTCCACGCCCGTGCAGAC 650  
\*

GIL1 CGACATCCCGGCGCTCCAGGACGTCCTCGGCGCCCGCGGCATCGAGCACG 700  
HF4 CGACATCCCGGCGCTCCAGGACGTCCTCGGCGCCCGCGGCATCGAGCACG 700

GIL1 TGGGCGTCGCGATCGACGGCCGCGAGACGGTCGGCGCCGGGGCGGATCTG 750  
HF4 TGGGCGTCGCGATCGACGGCCGCGAGACGGTCGGCGCCGGGGCGGATCTG 750

GIL1 GTGGGTCGGCAGTTCAACGCGTTCACGCCCCGAGAACGCCGGGAAGCCCGA 800  
 HF4 GTGGGTCGGCAGTTCAACGCGTTCACGCCCCGAGAACGCCGGGAAGCCCGA 800

GIL1 GAGCGTCCAGCCGGAGGAGGGCCGCTTCACGTTTCGCGCAGATCGACCAGC 850  
 HF4 GAGCGTCCAGCCGGAGGAGGGCCGCTTCACGTTTCGCGCAGATCGACCAGC 850

GIL1 TGCTCGACTACGCCGACAGGACCGGCACGAAGGTCTACTACCACGTGCTG 900  
 HF4 TGCTCGACTACGCCGACAGGACCGGCACGAAGGTCTACTACCACGTGCTG 900

GIL1 TTCTGGCACTCGCAGACCCCCGCGTGGTTCTTCCTCGACGGCGACCGGCC 950  
 HF4 TTCTGGCACTCGCAGACCCCCGCGTGGTTCTTCCTCGACGGCGACCGGCC 950

GIL1 GCTCACCGACAGCCCCGCCGACCAGGCGTGCTCCGGGCGCGCATGGAGG 1000  
 HF4 GCTCACCGACAGCCCCGCCGACCAGGCGTGCTCCGGGCGCGCATGGAGG 1000

GIL1 CGCACGTGAAGGGCATCGCGGACCACGTGGCGGCCCGCTACCCCCGACGGC 1050  
 HF4 CGCACGTGAAGGGCATCGCGGACCACGTGGCGGCCCGCTACCCCCGACGGC 1050

GIL1 GGCAGCCCGATCTGGGCGATGGACGTCGTGAACGAGGTCATCGACGACGG 1100  
 HF4 GGCAGCCCGATCTGGGCGATGGACGTCGTGAACGAGGTCATCGACGACGG 1100

GIL1 CCCC AACGACAACGCGCACGACATGCGCGACAGCCGCTGGTACCAGGTGC 1150  
 HF4 CCCC AACGACAACGCGCACGACATGCGCGACAGCCGCTGGTACCAGGTGC 1150

GIL1 TGGGGGAGGGCTTCGTCGACGAGGGCTTCCGCCTCGCGCGCGCGTACTTC 1200  
 HF4 TGGGGGAGGGCTTCGTCGACGAGGGCTTCCGCCTCGCGCGCGCGTACTTC 1200

GIL1 CCGGGGGTGAAGCTCTTCATCAACGACTACAACACGGAGCTGCCACGAA 1250  
 HF4 CCGGGGGTGAAGCTCTTCATCAACGACTACAACACGGAGCTGCCACGAA 1250

GIL1 GCGCGCCGACTACCTCGAGCTGATCTCCGCCCTCGTGGCCCGCGGTGTGC 1300  
 HF4 GCGCGCCGACTACCTCGAGCTGATCTCCGCCCTCGTGGCCCGCGGTGTGC 1300

GIL1 CGATCGACGGGGTGGGCCACCAGGCGCACGTCGACTTCGCCCGGCCCGTC 1350  
 HF4 CGATCGACGGGGTGGGCCACCAGGCGCACGTCGACTTCGCCCGGCCCGTC 1350

GIL1 TCGTGGCTGCGCGACTCCATCCGCGCGGTTCGAGCGCATCGACACGCGCCT 1400  
 HF4 TCGTGGCTGCGCGACTCCATCCGCGCGGTTCGAGCGCATCGACACGCGCCT 1400

GIL1 GCTGCAGGCGATCACCGAGCTCGACGTGAACGCGTTCGAACCAGAACGAGG 1450  
 HF4 GCTGCAGGCGATCACCGAGCTCGACGTGAACGCGTTCGAACCAGAACGAGG 1450

GIL1 GCGCGGACGTGAGCGGCGCTCCGCAGGATCCGTACACGCCCGTGTACGCG 1500  
 HF4 GCGCGGACGTGAGCGGCGCTCCGCAGGATCCGTACACGCCCGTGTACGCG 1500

\*

GIL1 GACGACCCGACGCGGGCGCCGAGGTTCGGGCACTACTACCGCGACCTCTT 1550



HF4 GACGACGCCGACGCGGGCGCCGAGGTCGGGCACTACTACCGCGACCTCTT 1550  
 GIL1 CCAGATGATCCGCCAGCAGGCCGCGTCCATCGACTCGGTACCTTCTGGG 1600  
 HF4 CCAGATGATCCGCCAGCAGGCCGCGTCCATCGACTCGGTACCTTCTGGG 1600  
 GIL1 GCGTGAGCAACGCGCGCAGCTGGCTGCGCACGTGGCCGATCGCGCGTCCG 1650  
 HF4 GCGTGAGCAACGCGCGCAGCTGGCTGCGCACGTGGCCGATCGCGCGTCCG 1650  
 GIL1 TGGGAGCAGCCGCTGCCGTTTCGACGACGACCTGCAGGCGGCTCCCGCCTA 1700  
 HF4 TGGGAGCAGCCGCTGCTGTTTCGACGACGACCTGCAGGCGGCTCCCGCCTA 1700  
 \*  
 GIL1 CTGGGGCATCGTCGACGCGAAGCGCCTCCCGGCACGACCGGCCGACCTCT 1750  
 HF4 CTGGGGCATCGTCGACGCGAAGCGCCTCCCGGCACGACCGGCCGACCTCT 1750  
 GIL1 CGGCGCCGCGCATCGCGGACGTGACGACATCACGGCGGTTCGCGACGAAG 1800  
 HF4 CGGCGCCGCGCATCGCGGACGTGACGACATCACGGCGGTTCGCGACGAAG 1800  
 GIL1 GCAGCGGGGGTCCGCGTGCCGTACGCGCTGCCCTCGGCGATCGACACGCG 1850  
 HF4 GCAGCGGGGGTCCGCGTGCCGTACGCGCTGCCCTCGGCGATCGACACGCG 1850  
 GIL1 CGACGGCAACCTGCGCGTGCTGTGCGCGCCGCCCGCAGCGGGATCTTCC 1900  
 HF4 CGACGGCAACGTGCGCGTGCTGTGCGCGCCGCCCGCAGCGGGATCTTCC 1900  
 \*  
 GIL1 CCGTCGGCACCACCACGGTCACCTGCACCGCGAAGGACCGCGCCGGCAAC 1950  
 HF4 CCGTCGGCACCACCACGGTCACCTGCACCGCGAAGGACCGCGCCGGCAAC 1950  
 GIL1 GTCCGGACGAGCGAGTTCGACGTGATCGTGACGCGCGCCGGCTCGTGAC 1999  
 HF4 GTCCGGACGAGCGAGTTCGACGTGATCGTGACGCGCGCCGGCTCGTGAC 1999

Cmn02654\_Pectate\_lyase

GIL1 ATGCGCATCCGCCTCCTCCCCGCCGCGCTCGCCGGCGCGCTCCTGCTCGT 50  
HF4 ATGCGCATCCGCCTCCTCCCCGCCGCGCTCGCCGGCGCGCTCCTGCTCGT 50

GIL1 CGCGCTGACGGGCACCGGCCCGACCGCTCCCGCCAGCGCCGCGACCGCGA 100  
HF4 CGCGCTGACGGGCACCGGCCCGACCGCTCCCGCCAGCGCCGCGACCGCGA 100

GIL1 GCGGCACCTCCGCCACCGCGAGCGCGTCCGCCGACTCCGGCTCCGGCTCC 150  
HF4 GCGGCACCTCCGCCACCGCGAGCGCGTCCGCCGACTCCGGCTCCGGCTCC 150

GIL1 GCGGCCACGGGCGCCGGCCCCACCGCCGCGTCGCCAGCGTCGCCGCCCT 200  
HF4 GCGGCCACGGGCGCCGGCCCCACCGCCGCGTCGCCAGCGTCGCCGCCCT 200

GIL1 GCGCGACGCCATCGCGCAGCACGTGCACCACATCGTCATCACCACCTCGC 250  
HF4 GCGCGACGCCATCGCGCAGCACGTGCACCACATCGTCATCACCACCTCGC 250

GIL1 TCTACGGCGGCACCTCGCCCCTACGTCGACGTGCTCGACTCGGCATCG 300  
HF4 TCTACGGCGGCACCTCGCCCCTACGTCGACGTGCTCGACTCGGCATCG 300

GIL1 AGCGGCACCGTCATCGAGGGCGCCACCCCGACGGTGGAACCTCGTGAACAT 350  
HF4 AGCGGCACCGTCATCGAGGGCGCCACCCCGACGGTGGAACCTCGTGAACAT 350

GIL1 CCAGCTGCGGATCTTCGACCTCACCTACGCGGGCGCCATCCACGACGTGA 400  
HF4 CCAGCTGCGGATCTTCGACCTCACCTACGCGGGCGCCATCCACGACGTGA 400

GIL1 CGGTGCGCGACCTCACCATGCACGGCCGCATCCAGGACCTCGTCGCGCTC 450  
HF4 CGGTGCGCGACCTCACCATGCACGGCCGCATCCAGGACCTCGTCGCGCTC 450

GIL1 ACGGGAGCGGCGACGAAGCCCTACGGCGTCGGCGTCAACTACGAGGCCAT 500  
HF4 ACGGGAGCGGCGACGAAGCCCTACGGGTGTCGGCGTCAACTACGAGGCCAT 500

\*

GIL1 CAGCGTGCGCGGGGCGCGCACGTGACGATCGACCACATCGTCGCCTACG 550  
HF4 CAGCGTGCGCGGGGCGCGCACGTGACGATCGACCACATCGTCGCCTACG 550

GIL1 ACACCACCGACGACCTTATGTTCGGTGACGCGCGGGGCGGACGACGTCACC 600  
HF4 ACACCACCGACGACCTTATGTTCGGTGACGCGCGGGGCGGACGACGTCACC 600

GIL1 ATCTCCAACAGCACGTTCTCGTACTCGCGCGCGTACGCGGACATCGACCC 650  
HF4 ATCTCCAACAGCACGTTCTCGTACTCGCGCGCGTACGCGGACATCGACCC 650

GIL1 GAGCATCACGTGGGACTGGGGCTTCGGCCTGCAGCCGCTCGCGTCCGAGC 700  
HF4 GAGCATCACGTGGGACTGGGGCTTCGGCCTGCAGCCGCTCGCGTCCGAGC 700

GIL1 GCCTCGGGATCCTCGTGGGCGCCAACGCGAAGGACAGCTACGCCGTCACC 750  
HF4 GCCTCGGGATCCTCGTGGGCGCCAACGCGAAGGACAGCTACGCCGTCACC 750

GIL1 GGCCACCTCCACGTGAACCTCGTCGACGACCACATCGGCCCGCTCGTCCG 800

HF4 GGCCACCTCCACGTGAACCTCGTCGACGACCACATCGGCCCGCTCGTCCG 800

GIL1 GGGACGGCCGCTGCTGCGCGGCGACGTGGACGTGAAGGGCGTGACGTTCG 850  
HF4 GGGACGGCCGCTGCTGCGCGGCGACGTGGACGTGAAGGGCGTGACGTTCG 850

GIL1 ACAACACGCAGGCAGGATCCGAGCAGTACGCGGCCATCGAGGTCGGCAGC 900  
HF4 ACAACACGCAGGCAGGATCCGAGCAGTACGCGGCCATCGAGGTCGGCAGC 900

GIL1 GGC GGCCGGTTCGTCGTCGAGGGCTGCGAGTTCGACCACTCGAACAACCC 950  
HF4 GGC GGCCGGTTCGTCGTCGAGGGCTGCGAGTTCGACCACTCGAACAACCC 950

GIL1 CATCGCGATCCACCTCGACTCACCCTCGGACACCTA 986  
HF4 CATCGCGATCCACCTCGACTCACCCTCGGACACCTA 986
